# Supplementary material
Source: PubMed Central journal article supplement (PMC6344314)
Supplement: NIHMS1512560-supplement-1.pdf [file NIHMS1512560-supplement-1.pdf]

## Appendix

### Supplemental Table 1

#### Reactive Attachment Disorder Item Descriptive Statistics Assessed at Each Wave

|                                                   | Baseline    | 30 months   | 42 months   | 54 months   | 8 years     | 12 years    |
|---------------------------------------------------|-------------|-------------|-------------|-------------|-------------|-------------|
| Presence of a preferred attachment figure         | 0.39 (0.70) | 0.19 (0.51) | 0.15 (0.50) | 0.16 (0.50) | 0.12 (0.43) | 0.15 (0.45) |
| Seeks comfort for distress from trusted caregiver | 0.38 (0.66) | 0.23 (0.57) | 0.21 (0.55) | 0.18 (0.49) | 0.14 (0.46) | 0.25 (0.56) |
| Accepts/responds to comfort                       | 0.08 (0.31) | 0.08 (0.34) | 0.05 (0.25) | 0.10 (0.35) | 0.05 (0.22) | 0.12 (0.41) |
| Engages in social reciprocity                     | 0.38 (0.74) | 0.11 (0.41) | 0.05 (0.30) | 0.07 (0.30) | 0.14 (0.43) | 0.16 (0.50) |
| Regulates emotions                                | 0.34 (0.60) | 0.33 (0.59) | 0.25 (0.53) | 0.15 (0.40) | 0.15 (0.43) | 0.22 (0.53) |

*Note.* Mean (SD). Higher scores indicate greater difficulties in each domain.
